# Supplementary material
Source: PubMed Central journal article supplement (PMC2712443)
Supplement: NIHMS111743-supplement-1_si_001.pdf [file NIHMS111743-supplement-1_si_001.pdf]

# The Mechanism of Nitration of Tyrosine by Peroxynitrous Acid

Hakan Gunaydin and K. N. Houk\*

*Department of Chemistry and Biochemistry, University of California, Los Angeles,  
California, 90095.*

E-mail: [houk@chem.ucla.edu](mailto:houk@chem.ucla.edu)

(1)

|   |        |        |        |
|---|--------|--------|--------|
| C | -1.260 | -0.698 | 0.000  |
| C | -0.061 | -1.416 | 0.000  |
| C | 1.149  | -0.737 | 0.000  |
| C | 1.208  | 0.664  | 0.000  |
| C | 0.000  | 1.360  | 0.000  |
| C | -1.226 | 0.694  | 0.000  |
| H | -0.100 | -2.498 | 0.000  |
| H | 2.072  | -1.309 | 0.000  |
| C | 2.536  | 1.384  | 0.000  |
| H | 0.008  | 2.446  | 0.000  |
| H | -2.152 | 1.262  | 0.000  |
| H | 2.399  | 2.467  | 0.000  |
| H | 3.132  | 1.125  | 0.881  |
| H | 3.132  | 1.125  | -0.881 |
| O | -2.426 | -1.415 | 0.000  |
| H | -3.170 | -0.805 | 0.000  |

(2)

|   |        |        |       |
|---|--------|--------|-------|
| H | 1.162  | -0.581 | 0.000 |
| O | 1.330  | 0.387  | 0.000 |
| O | 0.000  | 0.908  | 0.000 |
| N | -1.000 | -0.058 | 0.000 |
| O | -0.601 | -1.172 | 0.000 |

(3)

|   |        |        |        |
|---|--------|--------|--------|
| C | -0.516 | 1.347  | -0.299 |
| C | -0.595 | -0.147 | -0.674 |
| C | 0.669  | -0.942 | -0.548 |
| C | 1.800  | -0.405 | -0.067 |

C 1.818 1.003 0.353  
C 0.754 1.821 0.256  
N -1.649 -0.832 0.227  
H 0.622 -1.980 -0.860  
C 3.078 -1.188 0.065  
H 2.750 1.386 0.756  
H 0.790 2.860 0.561  
H 3.415 -1.204 1.107  
H 2.954 -2.218 -0.269  
H 3.879 -0.729 -0.524  
O -1.473 2.065 -0.496  
O -2.243 -1.771 -0.269  
O -1.769 -0.419 1.364  
H -1.024 -0.228 -1.673

(4)

C 0.830 1.836 -0.000  
C -0.432 1.220 -0.000  
C -0.458 -0.192 -0.000  
C 0.726 -0.944 0.000  
C 1.963 -0.326 0.000  
C 1.987 1.084 0.000  
O -1.515 2.003 -0.000  
N -1.721 -0.909 0.000  
O -2.773 -0.240 0.000  
C 3.246 -1.120 0.000  
O -1.716 -2.128 -0.000  
H 0.636 -2.022 0.000  
H 2.944 1.596 0.000  
H 0.858 2.919 -0.000  
H 3.853 -0.892 0.882  
H 3.048 -2.193 -0.000  
H 3.854 -0.891 -0.881  
H -2.295 1.406 -0.000

(5)

C 1.311 0.008 -0.000  
C 0.592 -1.213 0.000  
C -0.778 -1.234 0.000  
C -1.548 -0.002 -0.001  
C -0.786 1.233 0.000  
C 0.588 1.221 -0.000  
O -2.798 -0.006 0.000  
C 2.814 -0.001 -0.000  
H -1.351 2.158 0.000  
H 1.137 2.157 0.000

H 1.148 -2.146 0.000  
H -1.338 -2.161 0.000  
H 3.203 -0.526 -0.879  
H 3.223 1.010 -0.001  
H 3.203 -0.524 0.880

(6)

C -0.604 1.803 -0.416  
C 0.519 1.232 0.136  
C 0.479 -0.152 0.687  
C -0.843 -0.806 0.641  
C -1.933 -0.208 0.080  
C -1.816 1.108 -0.460  
O 1.672 1.928 0.226  
N 1.592 -1.037 -0.138  
O 2.732 -0.573 -0.123  
C -3.271 -0.903 0.034  
O 1.256 -2.059 -0.680  
H -0.917 -1.796 1.073  
H -2.683 1.577 -0.911  
H -0.521 2.811 -0.807  
H -4.037 -0.315 0.548  
H -3.603 -1.035 -1.000  
H -3.226 -1.888 0.502  
H 0.960 -0.196 1.672  
H 2.405 1.291 0.290

(7)

C 1.722 -1.198 -0.096  
C 0.363 -1.197 -0.380  
C -0.306 0.018 -0.503  
C 0.367 1.222 -0.339  
C 1.730 1.206 -0.056  
C 2.428 0.001 0.072  
O -1.646 0.027 -0.876  
N -2.602 -0.009 0.273  
O -2.129 -0.044 1.372  
C 3.905 -0.017 0.381  
O -3.732 0.003 -0.104  
H -0.174 2.154 -0.444  
H 2.258 2.145 0.067  
H 2.245 -2.143 -0.004  
H -0.184 -2.122 -0.516  
H 4.107 -0.558 1.310  
H 4.468 -0.517 -0.413  
H 4.303 0.994 0.488

Hydroxyl Radical

O 0.000 0.000 0.108  
H 0.000 0.000 -0.867

Carbonate radical

C 0.000 0.000 0.000  
O 0.000 1.272 0.000  
O 1.101 -0.636 0.000  
O -1.101 -0.636 0.000

Nitrogen Dioxide Radical

N 0.000 0.000 0.323  
O 0.000 1.101 -0.141  
O 0.000 -1.101 -0.141

Water

O 0.000 0.000 0.119  
H 0.000 0.757 -0.475  
H 0.000 -0.757 -0.475

TS [HOONO  $\rightarrow$  HO + NO<sub>2</sub>]

H 0.846 -1.643 0.000  
O -0.113 -1.514 0.000  
O 1.058 0.432 0.000  
N 0.000 0.977 0.000  
O -1.051 0.433 0.000

TS [O<sub>2</sub>COONO<sup>-</sup>  $\rightarrow$  CO<sub>3</sub><sup>-</sup> + NO<sub>2</sub>]

C -0.851 -1.077 0.245  
C -0.973 -0.040 -0.734  
C -2.203 0.545 -1.023  
C -3.376 0.167 -0.370  
C -3.273 -0.851 0.601  
C -2.069 -1.453 0.903  
C -4.704 0.816 -0.675  
O 0.264 -1.636 0.547  
N 0.779 1.551 0.962  
O 1.082 2.443 0.219  
H -2.247 1.324 -1.781  
H -4.171 -1.170 1.127  
H -2.003 -2.236 1.651  
H -5.466 0.079 -0.958  
H -5.101 1.368 0.187  
H -4.613 1.527 -1.501  
H -0.090 0.240 -1.295

H 1.471 -1.264 -0.187  
O 1.476 0.639 1.364  
O 3.215 0.501 0.465  
C 3.296 -0.383 -0.506  
O 4.376 -0.413 -1.092  
O 2.297 -1.167 -0.831

HCO<sub>3</sub>

C 0.000 0.178 0.000  
O 1.226 0.418 0.000  
O -0.301 -1.249 0.000  
O -0.999 0.901 0.000  
H 0.588 -1.620 0.000

O<sub>2</sub>COONO<sup>-</sup>

N 1.943 0.185 -0.117  
O 1.738 0.207 1.057  
O 0.967 -0.389 -0.908  
O -0.167 -0.918 -0.194  
C -1.302 0.150 0.005  
O -2.234 -0.451 0.530  
O -1.027 1.276 -0.386

CO<sub>3</sub>--NO<sub>2</sub> Complex

C 1.390 0.000 -0.001  
O 0.765 1.108 0.055  
O 0.765 -1.107 -0.067  
O 2.658 -0.000 0.007  
O -1.664 -0.063 1.093  
N -2.169 0.000 0.003  
O -1.669 0.062 -1.089

O<sub>2</sub>COONO<sub>2</sub><sup>-</sup>--(1) Complex

C -2.499 -1.514 -0.491  
C -1.408 -0.667 -0.243  
C -1.667 0.643 0.198  
C -2.978 1.070 0.380  
C -4.073 0.233 0.140  
C -3.802 -1.066 -0.302  
O -0.171 -1.148 -0.443  
C -5.490 0.705 0.378  
O 1.492 0.815 0.175  
C 2.529 1.352 -0.233  
O 2.935 2.485 -0.368  
O 3.617 0.404 -0.692  
O 3.226 -0.978 -0.631

|   |        |        |        |
|---|--------|--------|--------|
| N | 3.465  | -1.589 | 0.608  |
| O | 3.907  | -0.899 | 1.452  |
| H | -3.151 | 2.089  | 0.718  |
| H | -4.628 | -1.743 | -0.505 |
| H | -2.297 | -2.521 | -0.838 |
| H | -6.207 | 0.125  | -0.210 |
| H | -5.782 | 0.608  | 1.432  |
| H | -5.613 | 1.758  | 0.107  |
| H | -0.825 | 1.301  | 0.384  |
| H | 0.519  | -0.461 | -0.245 |

#### ONO--HO Complex

|   |        |        |       |
|---|--------|--------|-------|
| O | -2.217 | 0.265  | 0.000 |
| N | -1.042 | -0.053 | 0.000 |
| O | 0.000  | 0.595  | 0.000 |
| H | 1.992  | -0.322 | 0.000 |
| O | 2.880  | -0.774 | 0.000 |

#### TS1 (ONOOH decomposition TS in the presence of p-methyphenol and one water molecule)

|   |        |        |        |
|---|--------|--------|--------|
| C | -0.192 | -1.229 | 0.515  |
| C | -0.446 | -1.051 | -0.853 |
| C | -1.629 | -0.448 | -1.264 |
| C | -2.592 | -0.007 | -0.346 |
| C | -2.325 | -0.198 | 1.014  |
| C | -1.144 | -0.792 | 1.448  |
| C | -3.858 | 0.672  | -0.809 |
| O | 0.932  | -1.815 | 0.985  |
| O | 2.863  | -1.564 | -0.979 |
| O | 2.996  | 1.231  | -0.692 |
| O | 2.043  | 1.107  | 0.838  |
| N | 0.923  | 1.608  | 0.846  |
| O | 0.417  | 2.258  | -0.010 |
| H | -1.812 | -0.323 | -2.327 |
| H | -3.052 | 0.126  | 1.751  |
| H | -0.944 | -0.939 | 2.503  |
| H | -4.658 | 0.568  | -0.072 |
| H | -3.698 | 1.744  | -0.968 |
| H | -4.213 | 0.252  | -1.753 |
| H | 0.280  | -1.398 | -1.580 |
| H | 2.380  | 1.765  | -1.223 |
| H | 1.612  | -1.876 | 0.280  |
| H | 3.032  | -0.601 | -0.950 |
| H | 3.722  | -1.995 | -0.954 |

#### TS2 (Re-aromatization transition state)

C 2.106 -1.101 -0.411  
C 0.941 -1.732 -0.725  
C -0.340 -1.143 -0.431  
C -0.301 0.246 0.113  
C 0.982 0.866 0.369  
C 2.156 0.205 0.191  
O -1.404 -1.806 -0.489  
N -1.329 1.191 -0.398  
O -0.962 2.312 -0.729  
C 3.491 0.809 0.542  
O -2.504 0.818 -0.435  
O -2.055 -0.815 1.699  
H 0.977 1.894 0.711  
H 3.046 -1.604 -0.620  
H 0.927 -2.721 -1.167  
H 4.155 0.834 -0.328  
H 3.379 1.831 0.908  
H 3.998 0.228 1.320  
H -1.106 -0.207 1.259  
H -2.097 -1.374 0.825  
H -2.797 -0.196 1.629
